# 1      **Genomic epidemiology and evolution of *Escherichia*** 2      ***coli* in wild animals**

3      Robert Murphy<sup>1,2</sup>

4      Martin Palm<sup>3</sup>

5      Ville Mustonen<sup>4,5</sup>

6      Jonas Warringer<sup>3</sup>

7      Anne Farewell<sup>3</sup>

8      Danesh Moradigaravand<sup>2\*†</sup>

9      Leopold Parts<sup>6,7\*†</sup>

10

11

12      1- University of Copenhagen, Department of Biology, Section for Ecology and Evolution,  
13      Universitetsparken 15, 2100 Copenhagen East, Denmark.

14

15      2- Center for Computational Biology, Institute of Cancer and Genomic Sciences, University  
16      of Birmingham, Birmingham, United Kingdom.

17

18      3- Department for Chemistry and Molecular Biology, University of Gothenburg, Gothenburg,  
19      Sweden, Centre for Antibiotic Resistance Research at the University of Gothenburg,  
20      Gothenburg, Sweden.

21

22      4- Organismal and Evolutionary Biology Research Programme, Department of Computer  
23      Science, Institute of Biotechnology, University of Helsinki, Helsinki, Finland.

24

25      5- Helsinki Institute for Information Technology HIIT, Helsinki, Finland.

26

27      6- Wellcome Sanger Institute, Wellcome Genome Campus, Hinxton, Cambridgeshire, United  
28      Kingdom.

29

30      7- Department of Computer Science, University of Tartu, Tartu, Estonia.

31

32

33      \* Shared authorship

34      † Corresponding authors

35 **Abstract**

36 *Escherichia coli* is a common bacterial species in the gastrointestinal tracts of warm-blooded  
37 animals and humans. Pathogenic and antimicrobial resistance in *E. coli* may emerge via host  
38 switching from animal reservoirs. Despite its potential clinical importance, knowledge of the  
39 population structure of commensal *E. coli* within wild hosts and the epidemiological links between  
40 *E. coli* in non-human hosts and *E. coli* in humans is still scarce. In this study, we analysed the  
41 whole genome sequencing data of a collection of 119 commensal *E. coli* recovered from the guts  
42 of 68 mammal and bird species in Mexico and Venezuela in the 1990s. We observed low  
43 concordance between the population structures of *E. coli* colonizing wild animals and the  
44 phylogeny, taxonomy and ecological and physiological attributes of the host species, with distantly  
45 related *E. coli* often colonizing the same or similar host species and distantly related host species  
46 often hosting closely related *E. coli*. We found no evidence for recent transmission of *E. coli*  
47 genomes from wild animals to either domesticated animals or humans. However, multiple  
48 livestock- and human-related virulence factor genes were present in *E. coli* of wild animals,  
49 including virulence factors characteristic for Shiga toxin-producing *E. coli* (STEC) and atypical  
50 enteropathogenic *E. coli* (aEPEC), where several isolates from wild hosts harboured the locus of  
51 enterocyte effacement (LEE) pathogenicity island. Moreover, *E. coli* in wild animal hosts often  
52 harboured known antibiotic resistance determinants, including against ciprofloxacin,  
53 aminoglycosides, tetracyclines and beta-lactams, with some determinants present in multiple,  
54 distantly related *E. coli* lineages colonizing very different host animals. We conclude that although  
55 the genome pools of *E. coli* colonizing wild animal and human gut are well separated, they share  
56 virulence and antibiotic resistance genes and *E. coli* underscoring that wild animals could serve as  
57 reservoirs for *E. coli* pathogenicity in human and livestock infections.

58

59 **Importance**

60 *Escherichia coli* is a clinically importance bacterial species implicated in human and livestock  
61 associated infections worldwide. The bacterium is known to reside in the guts of humans, livestock  
62 and wild animals. Although wild animals are recognized to serve as potential reservoirs for  
63 pathogenic *E. coli* strains, the knowledge of the population structure of *E. coli* in wild hosts is still  
64 scarce. In this study we used the fine resolution of whole genome sequencing to provide novel  
65 insights into the evolution of *E. coli* genomes within a broad range of wild animal species  
66 (including mammals and birds), the co-evolution of *E. coli* strains with their hosts and the genetics  
67 of pathogenicity of *E. coli* strains in wild hosts. Our results provide evidence for the clinical  
68 importance of wild animals as reservoirs for pathogenic strains and necessitate the inclusion of  
69 non-human hosts in the surveillance programs for *E. coli* infections.

70 **Introduction**

71  
72 *Escherichia coli* is a common Gram-negative commensal bacterium that resides in the intestines  
73 and faeces of warm-blooded animals as the dominant strain of the corresponding microbiomes (1).  
74 The commensal nature of *E. coli* may facilitate its dissemination across hosts, which provide the  
75 bacterium with a constant supply of nutrients and protection against environmental stresses (2,3).  
76 Pathogenic and Antibiotic Resistant (AMR) clones of *E. coli* have spread rapidly over recent years.  
77 Because half of the total natural *E. coli* population is estimated to inhabit environmental sites and  
78 a significant number of acute *E. coli* infections are known to have zoonotic origins (2), non-human  
79 hosts and settings are large potential reservoirs for pathogenic and AMR strains and genes (4).

80  
81 Despite its likely importance for human health, the genetic diversity of commensal *E. coli* within  
82 wild hosts is still poorly studied, primarily due to the difficulty of recovering samples. Some  
83 studies have suggested *E. coli* and colonized hosts to co-evolve, such that the genomic  
84 characteristics of *E. coli* depend on the host species (5,6). While neutral evolutionary forces likely  
85 dictate most of the *E. coli* genetic diversity, feeding habits, diet and the microenvironments of the  
86 gastrointestinal tracts of hosts may constitute powerful selection pressures driving the phenotypic  
87 differentiation of commensal strains. These factors have led to the result that *E. coli* from wild  
88 animals often fall into other genetic and phenetic clades and phylogroups than isolates retrieved  
89 from humans (5–7).

90  
91 Reports have described high multidrug resistance in some environmentally sourced *E. coli*, but  
92 strains found in wild animals generally display lower AMR than those found in livestock and non-

93 animal environmental samples. The proximity of wildlife to human settlements seems to influence  
94 the AMR of gut microbiomes in wild hosts, due to antibiotic pollution (8,9). Whether wild animals  
95 predominantly act as sources or sinks in AMR evolution is still unclear (10,11). A recent study in  
96 Nairobi found interactions between humans and livestock to catalyse the colonization of wildlife  
97 by AMR *E. coli*. Similar to AMR genes, the distribution of virulence factor genes within  
98 environmental *E. coli* isolates is still an understudied area, although accumulating evidence  
99 suggests that there are epidemiological links between pathogenic strains of *E. coli* in livestock and  
100 those in humans (12,13).

101  
102 The poor resolution of typing methods, the limited diversity of host species under study and the  
103 sampling bias towards food animals in previous studies have substantially limited our  
104 understanding of commensal *E. coli* in wild hosts. Furthermore, the effects of human interventions  
105 in the habitats, in particular the exposure of wild hosts to mass-produced antimicrobials,  
106 complicate efforts to study the genetic determinants of commensalism. To address these  
107 limitations, we examined whole genome sequences of 119 commensal *E. coli* isolated recovered  
108 from the faecal samples of 68 wild mammals and birds host species from North America,  
109 predominantly from Mexico (5). With an estimated 2000 different resident species, Mexico hosts  
110 10–12% of the world's biodiversity (14), which offers the opportunity to scrutinize the host-  
111 pathogen evolution for a wide range of wild host populations.

112  
113 Our results indicate that *E. coli* populations in wild hosts are only weakly associated with the  
114 taxonomy and ecological and physiological attributes of the host species. Furthermore, while we  
115 detected no recent epidemiological links with human strains, we observed local population mixing

116 and some sharing of antibiotic resistant genes and virulence genes between strains from wild and  
117 domesticated/livestock animal hosts. These results highlight the subtle distinction between  
118 virulence and commensalism and implicate wild hosts as reservoirs for *E. coli* pathogens.

## 119 **Material & Methods**

120

### 121 **Strain acquisition, sequencing and genome assembly**

122 We acquired a systematic collection of commensal *E. coli* from a previous study (5). The collection  
123 comprised 119 faecal strains from hosts belonging to 81 animal species, 31 families and 16 orders.  
124 110 and 9 strains were from mammals and birds, respectively. 110 strains were recovered from  
125 Mexico and the rest were isolated in Venezuela and Costa Rica during the 1990s. The antimicrobial  
126 susceptibility testing was conducted on the whole collection for 8 antimicrobials clinically  
127 approved for treating *E. coli* infections, including beta-lactams (ampicillin, cefotaxime,  
128 ceftazidime, cefuroxime and cephalothin), aminoglycosides (gentamicin and tobramycin),  
129 ciprofloxacin and trimethoprim, as described in (15). The full description of the strains with  
130 metadata is available in Supplementary Table S1.

131

132 DNA was extracted with the QIAextractor (Qiagen) kit according to the manufacturer's  
133 instructions. We prepared Illumina sequencing libraries with a 450-bp insert size and performed  
134 sequencing on an Illumina HiSeq2000 sequencing machine with pair-end reads of length 100 bp.  
135 Ninety-six samples were multiplexed to yield an average depth of coverage of ~85 fold. Short  
136 reads data were submitted to the European Nucleotide Archive under the study accession number  
137 of PRJEB23294. Reads were then assembled and improved with an automated pipeline, based on  
138 Velvet with default parameters. Assemblies were annotated with an improvement assembly and  
139 Prokka-based annotation pipeline, respectively (16–18). Details on assembly statistics and gene  
140 annotations are available in Supplemental Table S1. Roary, with the sequence identity value of  
141 95% for orthologous groups, was used to create a pan-genome from annotated contigs (19).

142 Multilocus sequence typing was performed on assemblies using a publicly accessible typing tool  
143 and database, available on ([www.github.com/sanger-pathogens/mlst\\_check](http://www.github.com/sanger-pathogens/mlst_check)) with default  
144 parameter values to identify ST clones. We contextualized our collection with *E. coli* strains from  
145 environment, livestock/domesticated animals and humans in the publicly available Enterobase  
146 dataset ([www.enterobase.warwick.ac.uk](http://www.enterobase.warwick.ac.uk)). Since we were primarily interested in recent evolution  
147 and transmissions between *E. coli* in wild hosts and other hosts, we retrieved genomic data and  
148 metadata for all strains with an identical ST with at least one strain in our collection on 26/04/2020.  
149 We included only strains for which prior consent was obtained from the strain's owners. In total,  
150 genomic data for 1826 strains was retrieved. We then classified strains based on their source of  
151 isolation as environment, livestock/domesticated animals and human associated. We used the  
152 above-mentioned pipeline to assemble the pair-ended short reads and annotate the assemblies also  
153 for external samples.

154

### 155 **Mapping, variant calling and phylogenetic analysis**

156 We mapped short-read sequences to the *E. coli* K12 sequence (Biosample id: SAMN02604091),  
157 with SMALT v 0.7.4 ([www.sanger.ac.uk/resources/software/smalt/](http://www.sanger.ac.uk/resources/software/smalt/)), with a minimum score of 30  
158 for mapping. SAMtools and BCFtools were then employed to annotate SNPs (20). SNPs at sites  
159 in which SNPs were present in less than 75% of reads were excluded. We extracted SNPs from  
160 the core-genome alignment produced by Roary and mapping to the *E. coli* K12 reference genome  
161 using the script available at <https://github.com/sanger-pathogens/snp-sites>.

162

163 To construct the alignment-free phylogenetic trees, we first enumerated  $k$ -mers of size 50 from  
164 assemblies with the frequency-based substring mining (fsm-lite) package



165 ([www.github.com/nvalimak/fsm-lite](https://www.github.com/nvalimak/fsm-lite)). We subsequently counted the number of identical  $k$ -mers  
166 for pairs of isolates to produce a similarity matrix, which was then converted into a distance matrix.  
167 The distance matrix was used as input for the ape (21) and phangorn (22) packages to produce a  
168 neighbour-joining phylogenetic tree. The tree was visualized with iTOL (23) and Figtree  
169 ([www.tree.bio.ed.ac.uk/software/figtree/](https://www.tree.bio.ed.ac.uk/software/figtree/)).

170

171 **Virulence factors, antimicrobial resistance genes identification and *in silico* serotyping and**  
172 **LEE typing**

173 Virulence factors and antimicrobial resistance genes were identified with the srst2 (24) package  
174 using the Virulence Factor Data Base (VFDB) (25) and ResFinder database (26) available in the  
175 package, respectively. We employed a loose similarity cut-off of 60% to ensure that divergent  
176 genes were detected.

177

178 The genomic context of the AMR genes was explored in two ways. First, we searched the  
179 Nucleotide database to find similar annotated genomic regions with the contig that contain the  
180 resistance gene with blastn. Second, to further examine whether genes are located on plasmid or  
181 chromosome, we also utilized PlasmidSPAdes (27) to first reconstruct plasmid assemblies and  
182 then screened the contigs for the AMR gene with blast, as part of the assembly graph viewer  
183 Bandage (28). We identified LEE loci and serotypes with the typing method in the srst2 package,  
184 using a similarity threshold of 60%. We then confirmed the presence of virulence factor genes by  
185 running blastn against assemblies. For the O-antigens produced by Wzy-dependent pathway,  
186 variations in unique genes *wzx* (encoding an O-antigen flippase) and *wzy* (encoding an O-antigen  
187 polymerase) were examined (29). For the ABC transporter-dependent pathway, variations in *wzm*

188 (encoding an O-antigen ABC transporter permease gene) and encoding *wzt* (encoding an ABC  
189 transporter ATP-binding gene), involved in O-antigen synthesis, were studied.

190

### 191 **Association with ecological and taxonomical attributes of host species**

192 We obtained the tree of life for the host wild host species with the R package *rotl* (30) and  
193 visualized the concordance between the host tree and the core genome tree of colonizing *E. coli*  
194 strains with *Dendroscope* (31). We used *treedist* function in *ape* package to compute the distance  
195 matrix from phylogenetic tree. For *E. coli* strains, the distance matrix was obtained from pairwise  
196 Hamming distances between core genome sequences. We then used a Mantel test with 1000  
197 permutations as part of *ade4* package (32) to assess the correlation between the distance matrices  
198 for *E. coli* genomes and that for host species. To compute the difference between the phylogenetic  
199 trees of *E. coli* strains and hosts, we used the *treedist* function, as part of the *phangorn* package in  
200 R. By doing so, we computed the square root of the sum of squares of differences in path length  
201 between each pair of tips in two trees (33). The path is defined as the number of edges within the  
202 tree that must be traversed to navigate from one tip to the other.

203

204 Furthermore, we dissected the relationship between virulence ability, measured as the total number  
205 of virulence genes, and ecological and physiological attributes of each host species in the  
206 panTHERIA database (34). The database includes a comprehensive species-level data set of life-  
207 history, ecological and geographical traits of all known extant mammals. Spearman's rank  
208 correlation coefficient values were computed to assess the significance of the correlation between  
209 virulence gene count and attributes.

210

## 211 **Positive selection analysis**

212 We analysed positive selection by reconstructing the ancestral sequence for each gene in the core  
213 genome, identified by Roary, with FastML (35). Subsequently the seqinR 1.0-2 package (36) was  
214 employed to compute the  $K_a$  and  $K_s$  values for each strain, in comparison to the ancestral sequence.  
215 We left out the strains with no synonymous changes, i.e.  $K_s=0$ . For functional enrichment  
216 analysis, COG categories of genes were extracted from the annotation by Prokka and assigned to  
217 functional classes.

218

## 219 **Bayesian analysis**

220 We constructed a Bayesian tree using the BEAST (37) to date the recent mixing between *E. coli*  
221 from wild hosts and other strains in a clone in the B1 phylogroup. The clone was identified with  
222 the clustering tool in adegenet package (38). To this end, we screened the SNP cut-off value for  
223 identifying clusters in the wild host and global collection and used the clustering that remained  
224 unchanged for the highest number of SNP cut-off values. We then extracted the cluster that  
225 contained a high number, i.e. 39/119, of *E. coli* strains from wild hosts.

226

227 We mapped the short reads for strains in the cluster to a local reference genome, i.e. the strain with  
228 the lowest number of contigs. We then ran Gubbins (39) with 5 iterations to remove hypervariable  
229 sites from the genome alignment and produced a neighbour-joining phylogenetic tree. To assess  
230 the strength of the temporal signal, we plotted the root-to-tip distance versus year of isolation and  
231 performed 10,000 bootstraps with randomized years to attain a distribution for R-squared values.  
232 Subsequently, we compared the R-squared value for the data distribution with the simulated  
233 distribution. The temporal signal was 40% confidence for the clone under study.

234 The multiple alignment was then used as input for BEAST. We examined a range of prior models,  
235 including a strict molecular clock and a log-normal model of a relaxed molecular clock with  
236 constant population size. Markov chain Monte Carlo (MCMC) simulations were performed three  
237 times for 50 million generations with sampling every 10 generations. A cut-off of 200 was chosen  
238 for the Effective Sample Size (ESS) of key parameters for the convergence. The 95% Highest  
239 Posterior Interval (HPI) was used to report the certainty on ages of ancestral nodes.

## 240 **Results**

241  
242 We sequenced 119 strains from 68 wild animal host species and found them to capture much of  
243 the known *E. coli* genetic diversity. Indeed, our wild host population contained representatives of  
244 all of the major known phylogroups of *E. coli*, with group B1 (55 strains, 47% of all) being most  
245 prevalent followed by B2 (21 strains, 18%), A(17 strains, 14%), D (15 strains, 13%) and E (7  
246 strains, 6%) (Figure 1A). The high frequency of B1 strains is consistent with previous  
247 epidemiological reports on *E. coli* isolated from domesticated animals but stands in contrast to the  
248 high prevalence of phylogroups B2 and A among *E. coli* isolated from human (40). *E. coli* from  
249 domesticated/livestock animals and North America were disproportionately likely to share  
250 phylogenetic origin with our wild *E. coli* strains (Figure S1A, S1B), suggesting regional  
251 dissemination of some *E. coli* phylogroups across both domesticated/livestock and wild animals.

252  
253 The concordance between the evolutionary histories of *E. coli* and their hosts was significant. Both  
254 comparisons of host and *E. coli* distance matrices ( $p=0.0001$ , Mantel test, Figure 2A) and distances  
255 between phylogenetic trees for *E. coli* strains and hosts to distances in randomized trees ( $p = 0.003$ ,  
256 1000 tests, Figure 2B) rejected completely random observations. Despite this, we found only a  
257 moderate correlation of 0.47 between the genetic distance matrices for *E. coli* strains and hosts  
258 (Figure 2A), with closely related *E. coli* often colonizing divergent wild hosts and closely related  
259 wild animal species often hosting distantly related *E. coli*. The weak genetic association between  
260 *E. coli* and their wild hosts is also evident at higher taxonomic levels, with only weak genetic  
261 clustering of *E. coli* according to the host class, order and family (Figure 1B). This is further  
262 confirmed by the extensive overlap in the distributions of SNP distances for *E. coli* pairs colonizing

263 host species from the same taxonomic groups and those of pairs colonizing different taxonomic  
264 groups (Figure 1C), as 0.95, 0.95 and 0.96 of ranges of distributions overlapped for taxonomic  
265 ranks of class, order or family, respectively. The accessory genome of *E. coli* colonizing wild hosts  
266 has evolved in concert with the core genome ( $p=0.0001$ ; Pearson's  $R=0.85$ , Mantel test on distance  
267 matrices for core genome and accessory genes; Figure S2). Thus, we found little evidence of  
268 horizontal gene transfer between lineages colonizing wild animals.

269

270 We compared the rates of non-synonymous and synonymous single nucleotide evolution ( $K_a/K_s$ )  
271 since the last shared common ancestor of *E. coli* colonizing wild animals. Out of 3,659 genes in  
272 the core genome, 253 genes had at least one  $K_a/K_s$  value above 1, with an average of 11.7 genes,  
273 i.e. 0.3% of total genes, per strain falling in this category (Figure S3A, S3B). The number of genes  
274 under strong positive selection did not show any link with host (Figure S3B). The strongly selected  
275 genes encoded proteins involved in a broad range of functions, including energy production,  
276 carbohydrate and ion metabolic and transport and signal transduction proteins being slightly  
277 overrepresented (Figure S3B). Thus, many diverse functions may have been involved in adapting  
278 *E. coli* to commensalism in different wild animals and genome-wide selection have not been  
279 affected by host species.

280

281 We next probed the genomic evolution and epidemiology of *E. coli* colonizing wild-animals in  
282 relation to those of the global *E. coli* collection coming from other hosts. We found no evidence  
283 for recent *E. coli* transmission from wild animals to human hosts or domesticated/livestock hosts,  
284 underscoring the role that ecological and geographical barriers played in limiting *E. coli* spread  
285 (Figure S1A). The most closely related *E. coli* strains colonizing wild animals and humans were

286 separated by 40 SNPs in their core-genomes, which, assuming a substitution rate of two SNPs/year  
287 (41), corresponds to 20 years. However, in a number of cases, we found signs of *E. coli* colonizing  
288 wild animals to have diverged recently from *E. coli* colonizing domesticated animals. This was  
289 particularly evident in the B1 phylogroup where one-third of our *E. coli* from wild animals,  
290 clustered with lineages isolated from domesticated/livestock animals ( $n = 96$ ), food ( $n = 12$ ) and  
291 environmental sources ( $n = 13$ ). We reconstructed the Bayesian tree of these 158 strains and found  
292 their last common ancestor to have lived about 1000 years ago, with a substantial expansion of the  
293 clade over the past 100 years (Figure 3). We identified eight incidents of strains jumping between  
294 wild animals and other sources in this clade, all during the last 100 years and all but one during  
295 the last 50 years (Figure 3). One recent incident involved *E. coli* jumping between wild hosts  
296 residing in city regions and domesticated/livestock animals. These *E. coli* host switching events  
297 may reflect anthropogenic intervention in the habitats of wild hosts, and the rapid urban and  
298 agricultural growth and environmental degradation in Mexico over the past decades (42).

299  
300 The recent *E. coli* jumps between wild and domesticated animals led us to examine whether *E. coli*  
301 colonizing the former harbour any known human or food-animal-linked virulence factors. We  
302 identified a range of virulence factor genes, including four types of toxin genes, two adhesin genes,  
303 two iron chelators and three transporters. These were present in *E. coli* colonizing different wild  
304 animals (Figure 4A). The frequency of virulence factors was on average higher for strains  
305 recovered from Primate (11.5 genes per isolate), Rodentia (9.5 genes per isolate) and Carnivora  
306 (12.5 genes per isolate) host species (Figure 4A, 4B). Some species not closely related to humans,  
307 such as birds, were colonized by strains carrying a high number of virulence factors (Figure 4A,

308 4B), suggesting that the pattern is not a reflection of the higher frequency of human- and livestock-  
309 associated genes in the database.

310  
311 Because both the physiology and ecology of the host species can affect the virulence factors  
312 encoded in the genomes of infectious bacteria, we examined the relationship between the number  
313 of virulence genes in *E. coli* colonizing wild animals and the 45 such features in the panTHERIA  
314 database. A previous study on four virulence genes revealed that body mass of the host species is  
315 positively linked with the number of virulence factors present in the gut microbiome and this was  
316 attributed to the gut complexity (43). However, our analysis on more virulence genes showed no  
317 such correlation, considering either adult, neonate or weaning body mass (Figure S4A). Only  
318 habitat breadth ( $p=0.013$ , Spearman's  $\rho=-0.23$ ), diet breadth ( $p=0.015$ , Spearman's  $\rho=-0.26$ ) and  
319 social group size ( $p=0.002$ , Spearman's  $\rho=0.29$ ) correlated significantly with virulence gene  
320 counts, with more diverse habitats and diets associating to fewer, and formation of larger social  
321 groups to more, virulence genes (Figure S4A, S4B). Larger social groups, as observed in  
322 Carnivora, Artiodactyla and Primates in Figure S4C, is known to increase the social transmissions  
323 of infectious agents in animal societies, which may facilitate the dispersion of virulence genes  
324 (44). Although a larger sample set is needed to examine the impact of potential confounding  
325 factors, the findings further support the idea that a complex network of host- and the environment-  
326 related factors shapes the genomic characteristics of commensal strains.

327  
328 Certain *E. coli* serotypes, which reflect O, H and K antigen variation and not necessarily  
329 evolutionary relatedness, are recognized to cause virulence in human and livestock associated-  
330 infection. We found 53 and 14 serotypes to be shared between *E. coli* strains in wild hosts and



331 those in domestic animal and human infections, respectively (Supplemental Table S1). In total, we  
332 identified 71 distinct serogroups and 14 strains that were not typeable among *E. coli* colonizing  
333 wild animals, further underscoring their broad diversity. The serogroups of 74 strains overlapped  
334 with those of known pathovars, including non-O157 Shiga toxin-producing *E. coli* (STEC) ( $n =$   
335 40), enterotoxigenic (ETEC) strains ( $n = 12$ ), enteropathogenic (EPEC) strains ( $n = 11$ ) and  
336 enteroaggregative (EAEC) strains ( $n = 11$ ), across hosts (Figure 5A) (Supplemental Table S1).  
337 The pathovars are recognized to have non-human sources and may be acquired via direct contact  
338 with either animals or their faeces in petting zoos and on farms (for STEC) or through the  
339 consumption of contaminated water and food (for EAEC and ETEC), as previously reported in  
340 Mexico (32,33). ETEC is also an important cause of diarrhoea in domestic animals, notably calves  
341 and piglets (45). Two strains from the wild hosts collection shared serotypes with pathogenic  
342 strains and contained genetic virulence hallmarks of their associated pathovars. One strain  
343 belonged to O111:H8, a clinically relevant enterohemorrhagic *E. coli* (EHEC) serotype, and  
344 contained both the enterocyte effacement (LEE) pathogenicity island (PAI) and the toxin *stx2*  
345 gene. This strain was recovered from a wild sheep close to a city. The other strain belonged to  
346 O78:H34 and was isolated from a parakeet carrying enteroaggregative *E. coli* (EAEC) virulence  
347 genes, including the plasmid-encoded, heat-stable enterotoxin toxin (EAST-1) and *aatA* and *aggR*,  
348 encoding a transporter of a virulence protein and a virulence regulator, respectively (Figure 3A).  
349 The serogroup was recently isolated from free pigeons in Brazil, showing the circulation of the  
350 pathovar amongst birds (46). None of the serotypes associated with STEC and ETEC pathovars  
351 were found to carry a toxin gene. Although the sharing of serotypes with pathovars does not  
352 necessarily cause the strain to become virulent, our serotype analysis further underscored the  
353 genetic overlap between *E. coli* in wild and food animals (see the discussion section).

354 We found the enterocyte effacement (LEE) pathogenicity island locus, a hallmark of STEC and  
355 EPEC pathovars, in 21 of the *E. coli* lineages from wild animal hosts and these hosts belonged to  
356 six different taxonomic orders (Figure 5B, Supplemental Table S1). The locus encodes factors  
357 required for the colonization of the human intestine (47). However, the absence of the plasmid  
358 carrying *E. coli* adherence factors (pEAF) led us to classify these isolates as atypical EPEC  
359 (aEPEC), an *E. coli* class widely spread across food animals and humans (48). The LEE-positive  
360 strains also harboured other virulence factors that are typical of EAEC and EXPEC pathovars and  
361 affect pathogenicity (Figure 5C). This included genes normally located on STEC virulence  
362 plasmids, such as pO157, pO26, *espP* and *nle*, all of which were significantly more frequent in  
363 LEE-positive strains than in LEE-negative strains (Figure 5C). We found 2 and 11 strains, all in  
364 the B1, E and D phylogroups, to carry the LEE2 and LEE3 variants respectively, while 8 strains,  
365 mainly in the B2 phylogroup, carried a non-typeable LEE loci. All three loci types were broadly  
366 distributed among host taxonomic families, in agreement with them benefitting *E. coli* colonization  
367 of animal guts in a general sense, as previously proposed for bovine hosts (12). Our findings also  
368 agree with the virulence ability of aEPEC strains spanning across a broad host range of with that  
369 virulence in STEC and EPEC strains evolved by commensal strains acquiring virulence factors  
370 sequentially (48).

371  
372 We found the *E. coli* collection in wild hosts turned to be sensitive to most antibiotics, except for  
373 ampicillin, against which 65% of strains were resistant (Supplemental Table S1). Their general  
374 susceptibility indicates the lack of exposure of wild animals to therapeutic levels of antimicrobials.  
375 Despite this, a range of AMR genes against beta-lactamase, aminoglycosides, sulfonates and  
376 ciprofloxacin were identified across different lineages and hosts species (Figures S5). The

377 discordance between AMR phenotypes and genotypes points to regulation mechanisms or epistatic  
378 interactions, affecting the penetrance of resistance genes. The genomic context of AMR genes  
379 turned out to be diverse, with genetic linkage to a range of phage genes and IS elements, including  
380 to IS91 and IS10. For AMR genes located on sufficiently long contigs, we explored the genomic  
381 context and found similarity with a broad host range Col-plasmids ( $n = 21$ ) and chromosomal ( $n$   
382  $= 3$ ) regions. The genomic contexts varied across host species; for example, while one strain from  
383 a *Pilosa*, a placental mammal, harboured an AMR gene cassette consisting of *tet*, *str* and *sul* genes,  
384 for four strains from different mammalian species, AMR genes were found sporadically distributed  
385 across the genome. Besides plasmid-borne resistance determinants, we identified a set of  
386 ciprofloxacin-resistance mutations in the *parE*, and *gyrA* genes, independently emerged across  
387 lineages (Figures S5). The strains were recovered from Carnivora, Rodentia and Passeriformes  
388 species. Four of the isolates belonged to the clinically relevant O17/77:H18 serotype, which forms  
389 a highly relevant pathogenic group in the phylogroup D. This group of *E. coli* were an emergent  
390 clinical threat in the 1990s, predominantly in North America (49). Ciprofloxacin was introduced  
391 into clinical settings in the 1980s (50), prior to the sampling time period of our collection. The  
392 presence of ciprofloxacin resistance determinants in wild hosts, therefore, suggests that either  
393 rapidly emerging resistance was transmitted from wild hosts into human settings prior to the  
394 sampling time period, or the pre-existence of resistance in wild hosts reservoirs.

395

396

397 .

## 398 **Discussion**

399 We provided insights into the evolution of the genetic repertoire for commensal lifestyles in wild  
400 hosts. The genome of wild host *E. coli* was stable and evolved mostly independently from host  
401 species. Certain lineages were recently mixed with *E. coli* strains from local  
402 domesticated/companion animals. Moreover, some strains harboured virulence and AMR genes  
403 shared with pathogenic human and livestock animal strains, highlighting the subtle distinction  
404 between pathogenicity and commensalism in *E. coli*. We note that since our strains were recovered  
405 from faeces, we are unable to delineate between pathogenicity and commensalism for our strains  
406 and to ascertain whether strains cause virulence when introduced into the blood stream.

407  
408 The ability of diverse strains to colonize similar host species and the diverse range of virulence  
409 factors in *E. coli* from wild hosts point to the flexibility of the *E. coli* genome. These factors  
410 provide a flexible genomic repertoire for adapting to diverse host environments, consistent with  
411 the coincidental hypothesis of virulence (1,51,52). The evolution of virulence is complex and  
412 driven by opposing forces. Higher virulence leads to higher survival within the microenvironment  
413 of a specific host's intestine but may harm the host, thus constraining the host range. Furthermore,  
414 the virulence factor gene may entail a fitness cost, leading to a loss of virulence in the long term.  
415 Here, our results provide evidence in favour of reduced host specialism, suggesting that a high  
416 level of versatility allows better domination and exploitation of resources in the evolution of *E.*  
417 *coli* (53,54).

418

419 The absence of recent divergence incidents between *E. coli* isolated from human and wild animals  
420 host suggests a clear separation between these groups. Hence, wild hosts are unlikely to have  
421 served as sources of recent human clinical infections. Such a clear genetic distinction between *E.*  
422 *coli* lineages in non-human and human settings has been suggested by several recent genomic  
423 epidemiological studies (55–57). However, *E. coli* colonizing in wild animal hosts may still serve  
424 as reservoirs for individual virulence or AMR genes, which can be transferred to pathogenic strains  
425 through HGT, or as genomic backbones which upon acquisition of further virulence factors may  
426 evolve into pathogens that can jump into human hosts. A recent large-scale genomic study has  
427 shown that livestock serve as an evolutionary source for human EPEC strains (12).

428

429 Our collection was predominantly recovered from Mexico in the 1990s. This clearly limits the  
430 scope of the implications of our results. In particular, over the past three decades, the rapid  
431 consumption of antibiotics, globalization, anthropogenic interventions in the wild, and  
432 contaminations of environmental sources potentially selected for higher virulence and resistance  
433 and facilitated jumping between human-wild hosts. Another limitation of our study is that we did  
434 not examine the intra-host diversity of *E. coli* strains. Genetically distinct strains reside within the  
435 gut, and their genetic composition varies across the different regions of the gut. Although it is  
436 known that one or two resident *E. coli* clones most often dominate the microbial community in the  
437 gut (58) and is likely to be one of the strains recovered from each species in our study, a deeper  
438 sampling from each host is required to examine the effect of interactions between complex  
439 intestinal microbiota and *E. coli* in within-host adaptation. Such sampling would also allow an  
440 examination of whether virulence genes in the dominant clone confers any fitness advantage over  
441 other clones. Our study also neglected the differential expression of virulence genes in commensal

442 strains (59), which determines the regulation and functional level of these genes. Therefore, the  
443 integration of transcriptomic, (meta-)genomic and metabolomic data in a follow-up study would  
444 complement our findings.

445  
446 Studies on *E. coli* genomics are biased towards the characterization of pathogenic clinical strains  
447 under therapeutic conditions. Deciphering the genetics of commensalism is necessary for  
448 understanding the transition from commensalism to pathogenicity. Besides providing  
449 epidemiological insights, such knowledge informs us about new host-pathogen interactions that  
450 could be targeted in treating *E. coli* infections.

451 **Figures**

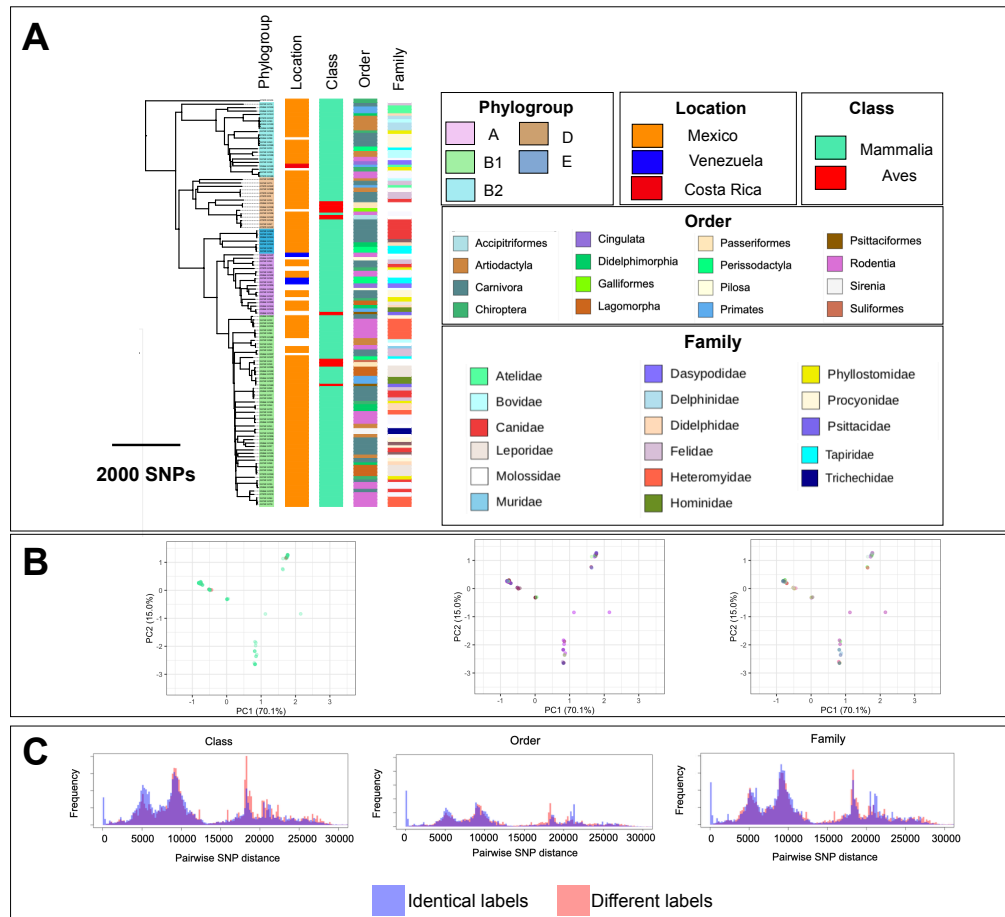

452

453 **Figure 1 Phylogenetic distribution of host specificity and cluster analysis:** A) phylogenetic  
 454 tree of 119 *E. coli* strains from wild hosts and its association with host taxonomic level. Families  
 455 represented by one strain are not shown. B) Principal component analysis of the strains, with labels  
 456 of the phylogroup and taxonomic rank. Each colour corresponds to one taxonomic rank. Families  
 457 represented by one strain are not shown. C) Distribution of pairwise SNP distances for strains  
 458 belonging to the same (red) and different (blue) taxonomic rank.

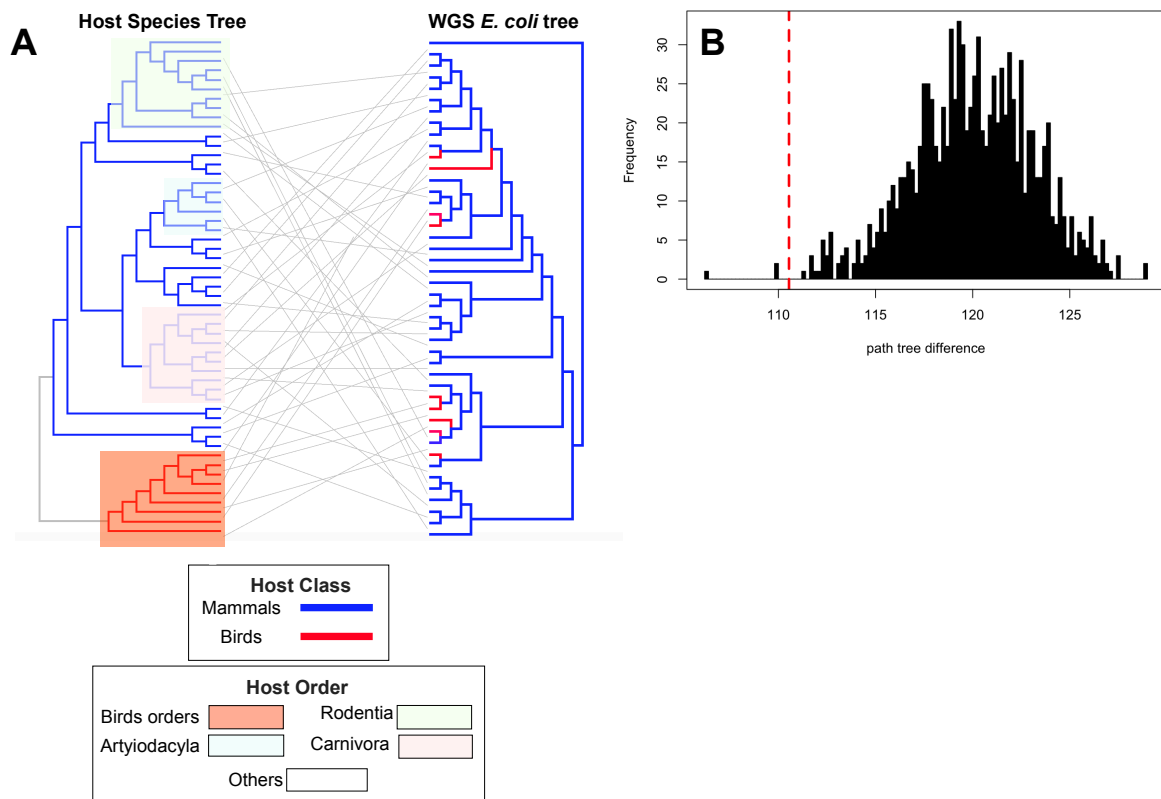

459

460 **Figure 2 Concordance between host and *E. coli* phylogenetic trees:** A) Phylogenetic tree of the  
461 whole genome sequencing of *E. coli* strains and the Tree of Life (TOL) for host strains. For host  
462 species for which more than one isolate was available in the dataset, one strain was randomly  
463 drawn. Clades for bird and major mammalian orders are highlighted. B) The distance, i.e. the path  
464 tree difference, between the trees in A) shown in dotted red line. The black bars are the distribution  
465 of path tree differences, computed for 1000 trees that were generated by randomly shuffling tree  
466 tips of the host tree in A).

467

468



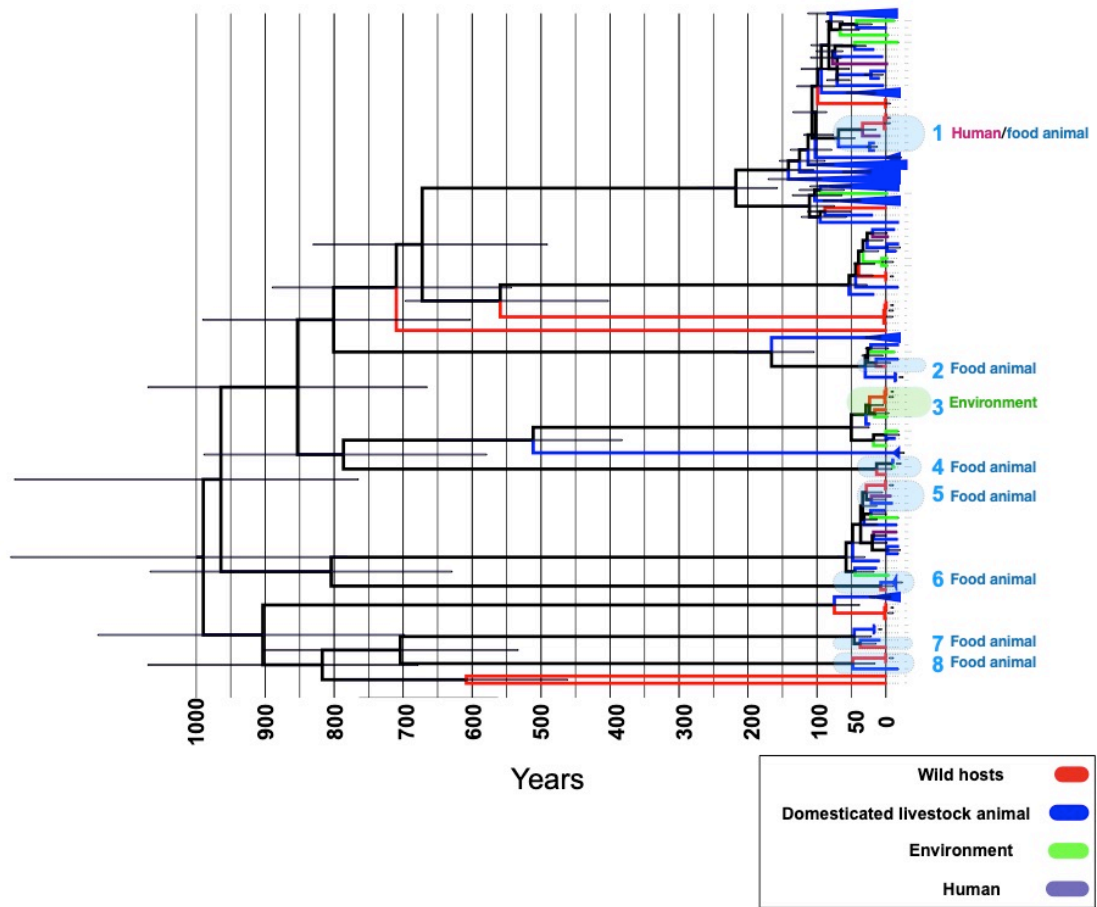

469

470

471

472

473 **Figure 3 Recent mixing of wild and non-wild hosts lineages:** Bayesian tree for strains in a clade

474 belonging to B1 phylogroup. The shaded boxes show putative host jumps events between wild

475 hosts and other sites, i.e. domesticated animals, environment and humans, over the past 100 years.

476 The error bar shows the 95% confidence interval from the Bayesian tree.

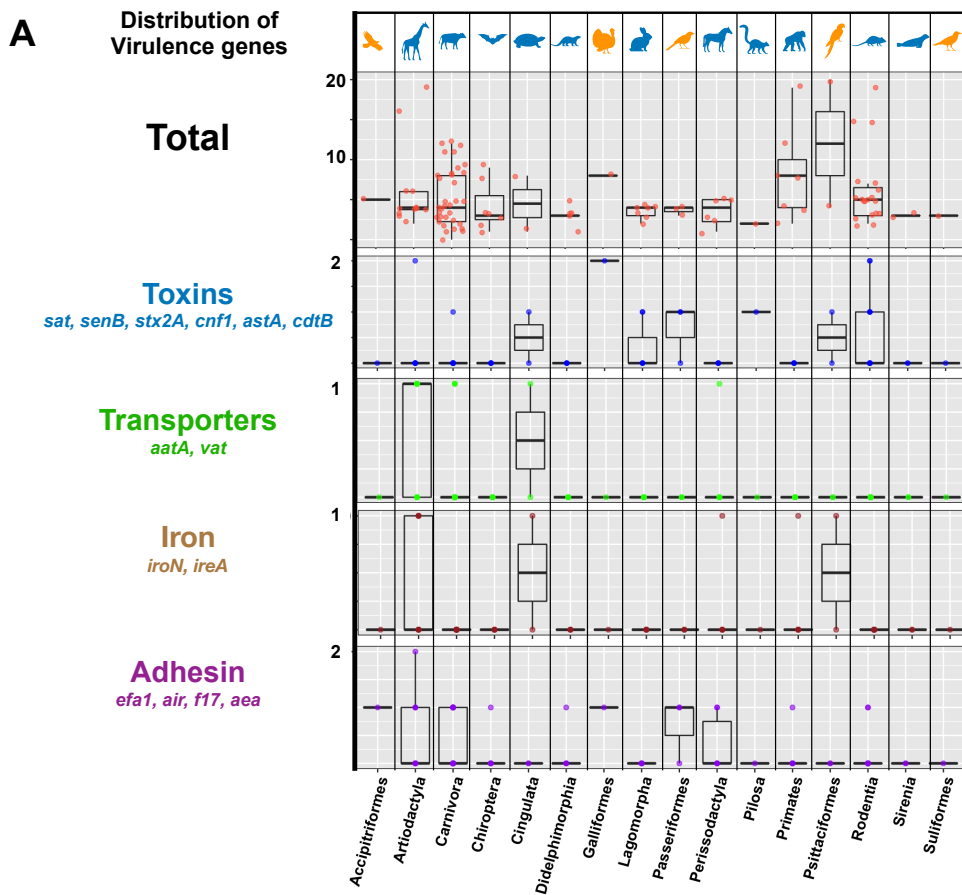

477

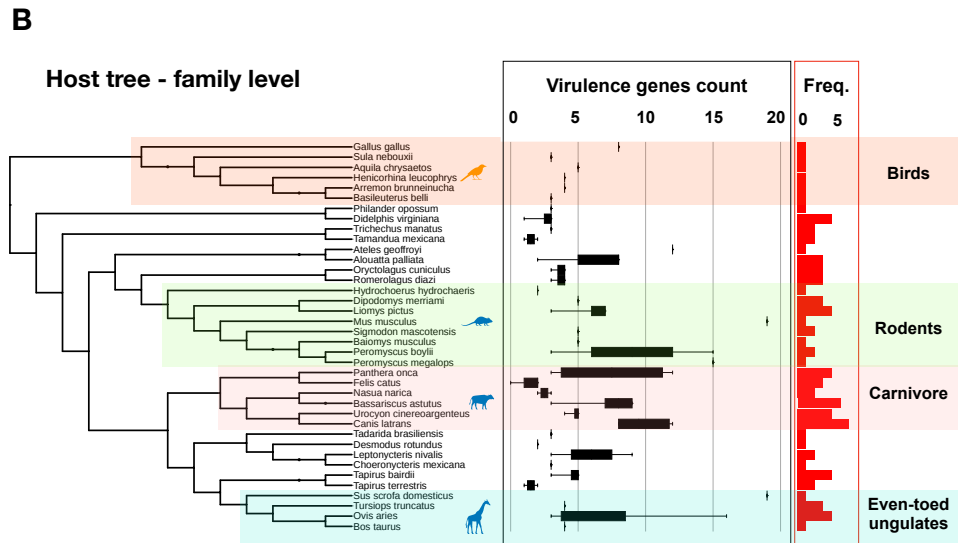

478

479 **Figure 4 Distribution of virulence factor genes:** A) The frequency of virulence factors genes  
 480 across functional groups and taxonomic orders. B) The phylogenetic distribution of *E. coli*  
 481 virulence genes across wild animal host species. The tree shows the tree of life for hosts, where  
 482 major orders are shown in shaded boxes. Bar plots show the frequency of genes. Horizontal  
 483 boxplots represent the distribution of virulence genes for strains recovered from each host across  
 484 host orders.

485

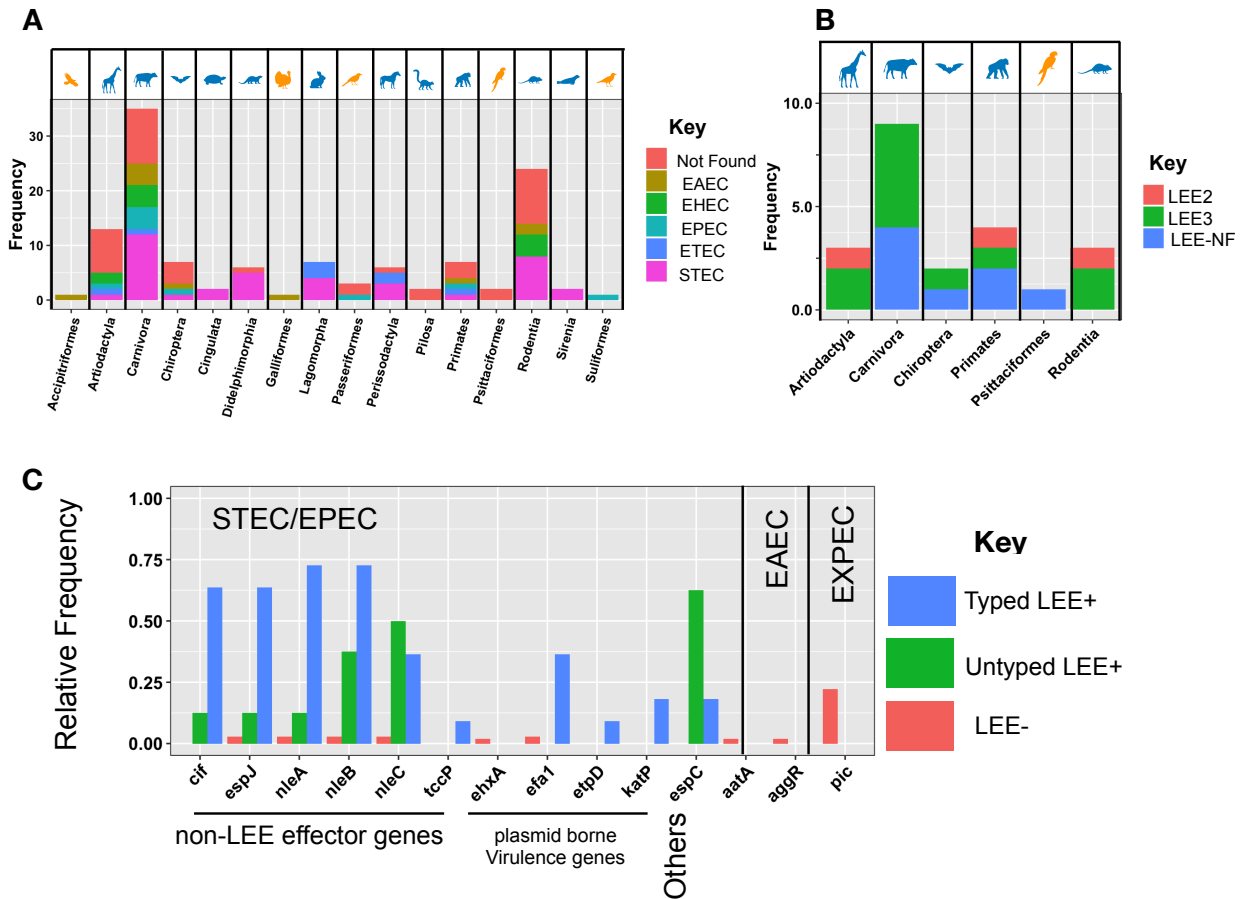

486

487 **Figure 5 Sharing of serotypes and distribution of LEE genes and effectors genes across hosts:**

488 A) Distribution of serotypes shared between *E. coli* colonizing wild hosts and known pathovars

489 across taxonomic orders of hosts. B) Distribution of typed and non-typed LEE families across

490 taxonomic orders of hosts. B) Distribution of virulence genes and LEE effector genes in typed,

491 untyped LEE(+) and LEE(-) strains.

492 **Acknowledgment**

493 We thank Jan Michels for providing the strains. This work was partially funded by a grant from  
494 the Centre for Antibiotic Resistance Research (CARE) at the University of Gothenburg to AF and  
495 grant number 2016-06503 from the Joint Programming Initiative on Antimicrobial Resistance  
496 (JPIAMR) to JW and AF. This work was in part supported by the Academy of Finland (grant  
497 313270 to VM). LP was supported by Wellcome, and Estonian Research Council (IUT34-4). DM  
498 was supported by the Joint Programming Initiative on Antimicrobial Resistance (JPIAMR) via  
499 MRC grant MR/R004501/1. The funders had no role in study design, data collection and analysis,  
500 decision to publish, or preparation of the manuscript.

501

502 **Supplemental Data:**

503 **Supplementary Figures Files**

504 **Supplemental Tables**

505 Supplemental Table S1: Samples specification, serotypes, associated pathovars and virulence and  
506 AMR genes

507

508 **References**

- 509 1. Tenaillon O, Skurnik D, Picard B, Denamur E. The population genetics of commensal  
510 *Escherichia coli*. *Nature Reviews Microbiology*. 2010.
- 511 2. García A, Fox JG, Besser TE. Zoonotic enterohemorrhagic *Escherichia coli*: A one health  
512 perspective. *ILAR J*. 2010;
- 513 3. Radhouani H, Silva N, Poeta P, Torres C, Correia S, Igrejas G. Potential impact of  
514 antimicrobial resistance in wildlife, environment, and human health. *Frontiers in*  
515 *Microbiology*. 2014.
- 516 4. Wright GD. The antibiotic resistome: The nexus of chemical and genetic diversity. *Nature*  
517 *Reviews Microbiology*. 2007.
- 518 5. Souza V, Rocha M, Valera A, Eguiarte LE. Genetic structure of natural populations of  
519 *Escherichia coli* in wild hosts on different continents. *Appl Environ Microbiol*. 1999;
- 520 6. Mercat M, Clermont O, Massot M, Ruppe E, De Garine-Wichatitsky M, Miguel E, et al.  
521 *Escherichia coli* population structure and antibiotic resistance at a buffalo/cattle interface  
522 in southern Africa. *Appl Environ Microbiol*. 2016;
- 523 7. Gordon DM, Cowling A. The distribution and genetic structure of *Escherichia coli* in  
524 Australian vertebrates: Host and geographic effects. *Microbiology*. 2003;
- 525 8. Martinez JL. Environmental pollution by antibiotics and by antibiotic resistance  
526 determinants. *Environmental Pollution*. 2009.
- 527 9. Gothwal R, Shashidhar T. Antibiotic Pollution in the Environment: A Review. *Clean -*  
528 *Soil, Air, Water*. 2015.
- 529 10. Hassell JM, Ward MJ, Muloi D, Bettridge JM, Robinson TP, Kariuki S, et al. Clinically

- 530 relevant antimicrobial resistance at the wildlife–livestock–human interface in Nairobi: an  
531 epidemiological study. *Lancet Planet Heal.* 2019;
- 532 11. Sato G, Oka C, Asagi M, Ishiguro N. Detection of conjugative R plasmids conferring  
533 chloramphenicol resistance in *Escherichia coli* isolated from domestic and feral pigeons  
534 and crows. *Zentralblatt fur Bakteriologie Mikrobiologie und Hygiene - Abteilung 1 Original A.* 1978;
- 535 12. Arimizu Y, Kirino Y, Sato MP, Uno K, Sato T, Gotoh Y, et al. Large-scale genome  
536 analysis of bovine commensal *Escherichia coli* reveals that bovine-adapted *E. coli*  
537 lineages are serving as evolutionary sources of the emergence of human intestinal  
538 pathogenic strains. *Genome Res.* 2019;
- 539 13. de Been M, Lanza VF, de Toro M, Scharringa J, Dohmen W, Du Y, et al. Dissemination  
540 of Cephalosporin Resistance Genes between *Escherichia coli* Strains from Farm Animals  
541 and Humans by Specific Plasmid Lineages. *PLoS Genet.* 2014;
- 542 14. Sarukhan J, Soberón Mainero J. Capital natural de México. *Capital natural de México.*  
543 2016.
- 544 15. Moradigaravand D, Palm M, Farewell A, Mustonen V, Warringer J, Parts L. Prediction of  
545 antibiotic resistance in *Escherichia coli* from large-scale pan-genome data. *PLoS Comput  
546 Biol.* 2018;
- 547 16. Page AJ, De Silva N, Hunt M, Quail MA, Parkhill J, Harris SR, et al. Robust high-  
548 throughput prokaryote de novo assembly and improvement pipeline for Illumina data.  
549 *Microb genomics.* 2016;
- 550 17. Seemann T. Prokka: Rapid prokaryotic genome annotation. *Bioinformatics.* 2014;
- 551 18. Zerbino DR, Birney E. Velvet: Algorithms for de novo short read assembly using de  
552 Bruijn graphs. *Genome Res.* 2008;

- 553 19. Page AJ, Cummins CA, Hunt M, Wong VK, Reuter S, Holden MTG, et al. Roary: Rapid  
554 large-scale prokaryote pan genome analysis. *Bioinformatics*. 2015;
- 555 20. Li H, Handsaker B, Wysoker A, Fennell T, Ruan J, Homer N, et al. The Sequence  
556 Alignment/Map format and SAMtools. *Bioinformatics*. 2009;
- 557 21. Paradis E, Schliep K. Ape 5.0: An environment for modern phylogenetics and  
558 evolutionary analyses in R. *Bioinformatics*. 2019;
- 559 22. Schliep KP. phangorn: Phylogenetic analysis in R. *Bioinformatics*. 2011;
- 560 23. Letunic I, Bork P. Interactive Tree of Life (iTOL) v4: Recent updates and new  
561 developments. *Nucleic Acids Res*. 2019;
- 562 24. Inouye M, Dashnow H, Raven LA, Schultz MB, Pope BJ, Tomita T, et al. SRST2: Rapid  
563 genomic surveillance for public health and hospital microbiology labs. *Genome Med*.  
564 2014;
- 565 25. Chen L, Yang J, Yu J, Yao Z, Sun L, Shen Y, et al. VFDB: A reference database for  
566 bacterial virulence factors. *Nucleic Acids Res*. 2005;
- 567 26. Zankari E, Hasman H, Cosentino S, Vestergaard M, Rasmussen S, Lund O, et al.  
568 Identification of acquired antimicrobial resistance genes. *J Antimicrob Chemother*. 2012;
- 569 27. Antipov D, Hartwick N, Shen M, Raiko M, Lapidus A, Pevzner PA. PlasmidSPAdes:  
570 Assembling plasmids from whole genome sequencing data. *Bioinformatics*. 2016;
- 571 28. Wick RR, Schultz MB, Zobel J, Holt KE. Bandage: Interactive visualization of de novo  
572 genome assemblies. *Bioinformatics*. 2015;
- 573 29. Samuel G, Reeves P. Biosynthesis of O-antigens: Genes and pathways involved in  
574 nucleotide sugar precursor synthesis and O-antigen assembly. *Carbohydrate Research*.  
575 2003.



- 576 30. Michonneau F, Brown JW, Winter DJ. rotl: an R package to interact with the Open Tree  
577 of Life data. *Methods Ecol Evol.* 2016;
- 578 31. Huson DH, Scornavacca C. Dendroscope 3: An interactive tool for rooted phylogenetic  
579 trees and networks. *Syst Biol.* 2012;
- 580 32. Dray S, Dufour AB. The ade4 package: Implementing the duality diagram for ecologists. *J*  
581 *Stat Softw.* 2007;
- 582 33. Penny D, Hendy MD. The Use of Tree Comparison Metrics. *Syst Zool.* 1985;
- 583 34. Jones KE, Bielby J, Cardillo M, Fritz SA, O'Dell J, Orme CDL, et al. PanTHERIA: a  
584 species-level database of life history, ecology, and geography of extant and recently  
585 extinct mammals. *Ecology.* 2009;
- 586 35. Ashkenazy H, Penn O, Doron-Faigenboim A, Cohen O, Cannarozzi G, Zomer O, et al.  
587 FastML: A web server for probabilistic reconstruction of ancestral sequences. *Nucleic*  
588 *Acids Res.* 2012;
- 589 36. Charif D, Lobry JR. SeqinR 1.0-2: A Contributed Package to the R Project for Statistical  
590 Computing Devoted to Biological Sequences Retrieval and Analysis. In 2007.
- 591 37. Bouckaert R, Heled J, Kühnert D, Vaughan T, Wu CH, Xie D, et al. BEAST 2: A  
592 Software Platform for Bayesian Evolutionary Analysis. *PLoS Comput Biol.* 2014;
- 593 38. Jombart T. Adegnet: A R package for the multivariate analysis of genetic markers.  
594 *Bioinformatics.* 2008;
- 595 39. Croucher NJ, Page AJ, Connor TR, Delaney AJ, Keane JA, Bentley SD, et al. Rapid  
596 phylogenetic analysis of large samples of recombinant bacterial whole genome sequences  
597 using Gubbins. *Nucleic Acids Res.* 2015;
- 598 40. Pallecchi L, Lucchetti C, Bartoloni A, Bartalesi F, Mantella A, Gamboa H, et al.

- 599 Population structure and resistance genes in antibiotic-resistant bacteria from a remote  
600 community with minimal antibiotic exposure. *Antimicrob Agents Chemother.* 2007;
- 601 41. Lee H, Popodi E, Tang H, Foster PL. Rate and molecular spectrum of spontaneous  
602 mutations in the bacterium *Escherichia coli* as determined by whole-genome sequencing.  
603 *Proc Natl Acad Sci U S A.* 2012;
- 604 42. Barton D, Klepeis P. Deforestation , Sustainability in Southeastern Mexico, 1900-2000.  
605 *Environ Hist Camb.* 2015;
- 606 43. Escobar-Páramo P, Le Menac'h A, Le Gall T, Amorin C, Gouriou S, Picard B, et al.  
607 Identification of forces shaping the commensal *Escherichia coli* genetic structure by  
608 comparing animal and human isolates. *Environ Microbiol.* 2006;
- 609 44. Nunn CL, Jordan F, Mc-Cabe CM, Verdolin JL, Fewell JH. Infectious disease and group  
610 size: More than just a numbers game. *Philos Trans R Soc B Biol Sci.* 2015;
- 611 45. Nagy B, Fekete PZ. Enterotoxigenic *Escherichia coli* (ETEC) in farm animals. *Veterinary*  
612 *Research.* 1999.
- 613 46. Borges CA, Maluta RP, Beraldo LG, Cardozo M V., Guastalli EAL, Kariyawasam S, et al.  
614 Captive and free-living urban pigeons (*Columba livia*) from Brazil as carriers of  
615 multidrug-resistant pathogenic *Escherichia coli*. *Vet J.* 2017;
- 616 47. Schmidt MA. LEEways: Tales of EPEC, ATEC and EHEC. *Cellular Microbiology.* 2010.
- 617 48. Ingle DJ, Tauschek M, Edwards DJ, Hocking DM, Pickard DJ, Azzopardi KI, et al.  
618 Evolution of atypical enteropathogenic *E. Coli* by repeated acquisition of LEE  
619 pathogenicity island variants. *Nat Microbiol.* 2016;
- 620 49. Griffin PM, Manges AR, Johnson JR. Food-borne origins of *Escherichia coli* causing  
621 extraintestinal infections. *Clin Infect Dis.* 2012;

- 622 50. Andersson MI. Development of the quinolones. *J Antimicrob Chemother.* 2003;
- 623 51. Adiba S, Nizak C, van Baalen M, Denamur E, Depaulis F. From grazing resistance to  
624 pathogenesis: The coincidental evolution of virulence factors. *PLoS One.* 2010;
- 625 52. Le Gall T, Clermont O, Gouriou S, Picard B, Nassif X, Denamur E, et al. Extraintestinal  
626 virulence is a coincidental by-product of commensalism in b2 phylogenetic group  
627 *Escherichia coli* strains. *Mol Biol Evol.* 2007;
- 628 53. Woodcock DJ, Krusche P, Strachan NJC, Forbes KJ, Cohan FM, Méric G, et al. Genomic  
629 plasticity and rapid host switching can promote the evolution of generalism: A case study  
630 in the zoonotic pathogen *Campylobacter*. *Sci Rep.* 2017;
- 631 54. Bäumlér AJ, Tsolis RM, Ficht TA, Adams LG. Evolution of host adaptation in *Salmonella*  
632 *enterica*. *Infection and Immunity.* 1998.
- 633 55. Ludden C, Raven KE, Jamrozny D, Gouliouris T, Blane B, Coll F, et al. One Health  
634 Genomic Surveillance of *Escherichia coli* Demonstrates Distinct Lineages and Mobile  
635 Genetic Elements in Isolates from Humans versus Livestock. *MBio.* 2019;
- 636 56. McEwen SA, Collignon PJ. Antimicrobial Resistance: a One Health Perspective.  
637 *Microbiol Spectr.* 2018;
- 638 57. Johnson TJ, Logue CM, Johnson JR, Kuskowski MA, Sherwood JS, Barnes HJ, et al.  
639 Associations between multidrug resistance, plasmid content, and virulence potential  
640 among extraintestinal pathogenic and commensal *Escherichia coli* from humans and  
641 poultry. *Foodborne Pathog Dis.* 2012;
- 642 58. Winfield MD, Groisman EA. Role of nonhost environments in the lifestyles of *Salmonella*  
643 and *Escherichia coli*. *Applied and Environmental Microbiology.* 2003.
- 644 59. Klemm P, Hancock V, Schembri MA. Mellowing out: Adaptation to commensalism by

- 645            Escherichia coli asymptomatic bacteriuria strain 83972. Infection and Immunity. 2007.
- 646    60.    Tatusov RL. The COG database: a tool for genome-scale analysis of protein functions and
- 647            evolution. Nucleic Acids Res. 2000;
- 648
